# Supplementary material
Source: HighWire-hosted journal article supplement (http://ajnr-stage2.highwire.org/highwire/filestream/63105/field_highwire_adjunct_files/0/18-00452.pdf)
Supplement: 18-00452.pdf [file 18-00452.pdf]

## ON-LINE APPENDIX: STATISTICAL ANALYSIS ON THE GROUP LEVEL

The 2 measures for clival hypoplasia (Ba-Es, Ba-Xs) and the measure for basioccipital steepness (the Welcher angle) are highly correlated, as shown in the correlation matrix table (On-line Table 3). We orthogonalized the data using factor analysis.

We chose to analyze the factors instead of the original data because the high correlations suggest a clear common component. Indeed, the first factor (principal component analysis, correlation-based) is a weighted average of all measures, and adding the data reduces the noise. The first factor explained 86% of the total variance. This factor (factor 1) has a positive correlation with Ba-Es and Ba-Xs and a negative correlation with the Welcher angle. Uncorrelated second and third factors could also contain information, though this is unlikely in view of the small amount of variance explained by these factors. Indeed, there was no significant difference between patients with CHARGE syndrome and healthy controls in these transformed measures (results not shown).

We modeled the first factor with nonlinear regression analysis on the normal data. Our measures were dependent on age, as shown by the highly significant linear and quadratic components of age (On-line Table 4), showing that our measures were dependent on age. *P* values are not corrected for multiple testing. We then applied the regression equation to all data and computed the observed minus predicted “residue” value for all data. The result is shown in the On-line Figure. Most of the patients with CHARGE syndrome showed a reduced value in factor 1.

After this correction for age, the difference between controls and patients with CHARGE syndrome can be tested without interfering bias due to the difference in the age distribution of controls and patients with CHARGE syndrome with a 2-sample *t* test. Despite some patients with CHARGE syndrome having clearly normal values, as a group they had significantly lower values ( $P < 0.001$ ) for factor 1. This means that patients with CHARGE syndrome, as a group, had a smaller clivus (Ba-Es and Ba-Xs) and a larger Welcher angle.

**On-line Table 1: Lists of clinical criteria of Blake et al, Verloes, and Hale et al for CHARGE syndrome**

| Major Criteria                                                                                                                                                                                              | Minor Criteria                                                                                                                                                                                                                                                                                                                                | Inclusion Rule                                                                                                                  |
|-------------------------------------------------------------------------------------------------------------------------------------------------------------------------------------------------------------|-----------------------------------------------------------------------------------------------------------------------------------------------------------------------------------------------------------------------------------------------------------------------------------------------------------------------------------------------|---------------------------------------------------------------------------------------------------------------------------------|
| Blake et al <sup>5</sup><br>Coloboma or microphthalmia<br>Choanal atresia or stenosis<br>Characteristic external ear anomaly, or middle/inner ear anomalies, or mixed deafness<br>Cranial nerve dysfunction | Cardiovascular malformations<br>Tracheo-esophageal defects<br>Genital hypoplasia or delayed puberty<br>Cleft lip/palate<br>Developmental delay<br>Growth retardation<br>Characteristic face                                                                                                                                                   | Typical<br>4 Major or<br>3 Major +3 minor                                                                                       |
| Verloes <sup>6</sup><br>Ocular coloboma<br>Choanal atresia<br>Hypoplastic semicircular canals                                                                                                               | Heart or esophagus malformation<br>Malformation of the middle or external ear<br>Rhombencephalic dysfunction, including sensorineural deafness<br>Hypothalamo-hypophyseal dysfunction<br>Mental retardation                                                                                                                                   | Typical<br>3 Major or<br>2 Major +2 minor<br>Partial<br>2 Major +1 minor<br>Atypical<br>2 Major +0 minor or<br>1 Major +3 minor |
| Hale et al <sup>7</sup><br>Coloboma<br>Choanal atresia or cleft palate<br>Abnormal external, middle or inner ears, including hypoplastic semicircular canals<br>Pathogenic <i>CHD7</i> variant              | Cranial nerve dysfunction, including hearing loss<br>Dysphagia/feeding difficulties<br>Structural brain abnormalities<br>Developmental delay/ID/autism<br>Hypothalamo-hypophyseal dysfunction (gonadotropin or growth hormone deficiency) and genital anomalies<br>Heart or esophagus malformation<br>Renal anomalies skeletal/limb anomalies | 2 Major + any No. of minor                                                                                                      |

**Note:**—ID indicates intellectual disability.

**On-line Table 2: Pearson correlation matrix**

|         | Ba-Es     | Ba-Xs     | Welcher  |
|---------|-----------|-----------|----------|
| Ba-Es   | 1.000000  |           |          |
| Ba-Xs   | 0.976623  | 1.000000  |          |
| Welcher | −0.702594 | −0.692526 | 1.000000 |

On-line Table 3: Patient characteristics and measurements

| Patient | Sex | Age at Evaluation | Molecular Diagnosis |             | Clinical Information  |               |                                          | Clivus          |                 |                              | Basioccipital            |                      |  |
|---------|-----|-------------------|---------------------|-------------|-----------------------|---------------|------------------------------------------|-----------------|-----------------|------------------------------|--------------------------|----------------------|--|
|         |     |                   | Mutation            | Type        | Symptoms <sup>a</sup> | Blake/Verloes | Morphology                               | Ba-Es (mm) (SD) | Ba-Xs (mm) (SD) | Welcher Angle (degrees) (SD) | Basioccipital Hypoplasia | Basilar Invagination |  |
| 1       | F   | 3 Days            | 7344_7345del        | Frameshift  | CHAE                  | +/+           | Abnormal                                 | 4 (−6.3)        | 5 (−5.9)        | 147 (+3.5)                   | +                        | +                    |  |
| 2       | M   | 10 Days           | 1480C>T             | Nonsense    | HE                    | +/?           | Abnormal                                 | 3 (−6.9)        | 2 (−7.5)        | 146 (+3.3)                   | +                        | +                    |  |
| 3       | M   | 12 Days           | 1820_1821insTTGT    | Frameshift  | CAGE                  | +/+           | Abnormal                                 | 4 (−6.3)        | 4 (−6.5)        | 141 (+2.1)                   | +                        | −                    |  |
| 4       | M   | 1 Mo              | 5680_5681del        | Frameshift  | CHRE                  | +/+           | Normal                                   | 8 (−4.0)        | 9 (−3.7)        | 134 (+0.4)                   | −                        | −                    |  |
| 5       | F   | 1 Mo              | 7879C>T             | Nonsense    | CHRE                  | +/+           | Abnormal                                 | 2 (−8.8)        | 2 (−7.1)        | 176 (+13.5)                  | +                        | +                    |  |
| 6       | F   | 4 Mo              | 5222G>C             | Missense    | CHGE                  | ?/+           | Abnormal                                 | 13 (−1.1)       | 13 (−1.6)       | 135 (+0.6)                   | +                        | −                    |  |
| 7       | F   | 4 Mo              | 7106del             | Frameshift  | CHE                   | +/+           | Abnormal, extra synchondrosis            | 15 (+0.1)       | 17 (+0.5)       | 139 (+1.6)                   | −                        | −                    |  |
| 8       | M   | 6 Mo              | 2238 + 1G>A         | Splice site | CRGE                  | +/+           | Abnormal                                 | 7 (−4.6)        | 6 (−5.8)        | 134 (+0.4)                   | +                        | −                    |  |
| 9       | M   | 6 Mo              | 6857dup             | Frameshift  | ARE                   | +/+           | Abnormal, extra synchondrosis            | 17 (−1.2)       | 15 (−1.2)       | 125 (−1.5)                   | +                        | −                    |  |
| 10      | M   | 1 Yr              | 3202-?_8994?del     | Deletion    | CGE                   | −/?           | Abnormal                                 | 5 (−8.9)        | 5 (−6.3)        | 140 (+1.4)                   | +                        | −                    |  |
| 11      | F   | 1 Yr 1 Mo         | 3340A>T             | Splice site | RGE                   | −/a           | Abnormal, extra synchondrosis            | 18 (−0.6)       | 19 (+0.7)       | 132 (−0.1)                   | +                        | −                    |  |
| 12      | M   | 1 Yr 2 Mo         | T714C>T             | Nonsense    | RGE                   | −/a           | Abnormal                                 | 5 (−8.9)        | 7 (−5.3)        | 134 (+0.3)                   | +                        | −                    |  |
| 13      | M   | 1 Yr 8 Mo         | 5535−7G>A           | Splice site | GE                    | −/a           | Abnormal                                 | 13 (−4.0)       | 11 (−3.9)       | 147 (+2.7)                   | +                        | n/e                  |  |
| 14      | M   | 1 Yr 10 Mo        | 1480C>T             | Nonsense    | CARGE <sup>b</sup>    | +/+           | Abnormal, extra synchondrosis            | 3 (−10)         | 4 (−6.8)        | 140 (+1.4)                   | +                        | +                    |  |
| 15      | M   | 2 Yr              | 7160C>A             | Nonsense    | CHAE                  | +/+           | Abnormal                                 | 4 (−9.2)        | 5 (−6.6)        | 158 (+5.3)                   | +                        | +                    |  |
| 16      | F   | 2 Yr 10 Mo        | 3973T>G             | Missense    | CRGE                  | ?/+           | Abnormal, extra synchondrosis            | 17 (−1.7)       | 16 (−1.3)       | 146 (+3.3)                   | −                        | −                    |  |
| 17      | F   | 2 Yr 10 Mo        | 7769del             | Frameshift  | E                     | −/?           | Normal                                   | 23 (+1.8)       | 18 (−0.3)       | 124 (−0.5)                   | −                        | −                    |  |
| 18      | M   | 5 Yr 7 Mo         | 4779del             | Frameshift  | HE                    | −/a           | Abnormal                                 | 4 (−8.0)        | 5 (−6.0)        | 146 (+5.5)                   | +                        | −                    |  |
| 19      | M   | 7 Yr 3 Mo         | 2442 + 5G>C         | Splice site | ARGE <sup>b</sup>     | +/a           | Abnormal, unilateral extra synchondrosis | 24 (+0.4)       | 22 (+0.4)       | 127 (+0.4)                   | −                        | −                    |  |
| 20      | M   | 10 Yr 2 Mo        | 2505T>A             | Nonsense    | HARGE                 | +/+           | Abnormal                                 | 11 (−4.4)       | 11 (−5.4)       | 137 (+2.0)                   | +                        | n/e                  |  |
| 21      | M   | 10 Yr 3 Mo        | 5564dupC            | Frameshift  | HARE <sup>b</sup>     | −/?           | Abnormal                                 | 4 (−6.3)        | 4 (−8.1)        | 144 (+3.0)                   | +                        | +                    |  |
| 22      | M   | 10 Yr 4 Mo        | 6157C>T             | Nonsense    | CRE                   | −/?           | Normal                                   | 23 (−1.1)       | 21 (−1.5)       | 132 (+1.2)                   | −                        | −                    |  |
| 23      | F   | 16 Yr 2 Mo        | 4015C>T             | Nonsense    | CARGE <sup>b</sup>    | +/?           | Abnormal, extra synchondrosis            | 26 (+0.1)       | 24 (−0.1)       | 137 (+1.6)                   | −                        | −                    |  |

**Note:**—+ indicates meets criteria for typical CHARGE; ?, insufficient information; −, does not meet criteria; a, meets criteria for atypical CHARGE; n/e, examination was not possible.

<sup>a</sup> C indicates coloboma; H, congenital heart defect; A, atresia of choanae or bilateral cleft lip/palate (marked by <sup>b</sup>); R, retardation of growth or development; G, genitourinary defects or hypogonadotropic hypogonadism; E, ear anomalies or deafness.

**On-line Table 4: Linear and quadratic component of age and modeling of first factor with nonlinear regression**

| Effect            | Coefficient | Std Error | Std Coefficient | Tolerance | T        | P (2-Tailed) |
|-------------------|-------------|-----------|-----------------|-----------|----------|--------------|
| CONSTANT          | −1.337657   | 0.227851  | 0.000000        |           | −5.87075 | <.001        |
| AGE_MONT          | 0.034869    | 0.007086  | 1.417818        | 0.078934  | 4.92105  | <.001        |
| AGE_MONT*AGE_MONT | −0.000112   | 0.000037  | −0.879080       | 0.078934  | −3.05116 | .003         |

**Note:**—Std indicates standard; AGE\_MONT, age in months (linear term); AGE\_MONT\*AGE\_MONT, age in months \* age in months (quadratic term).

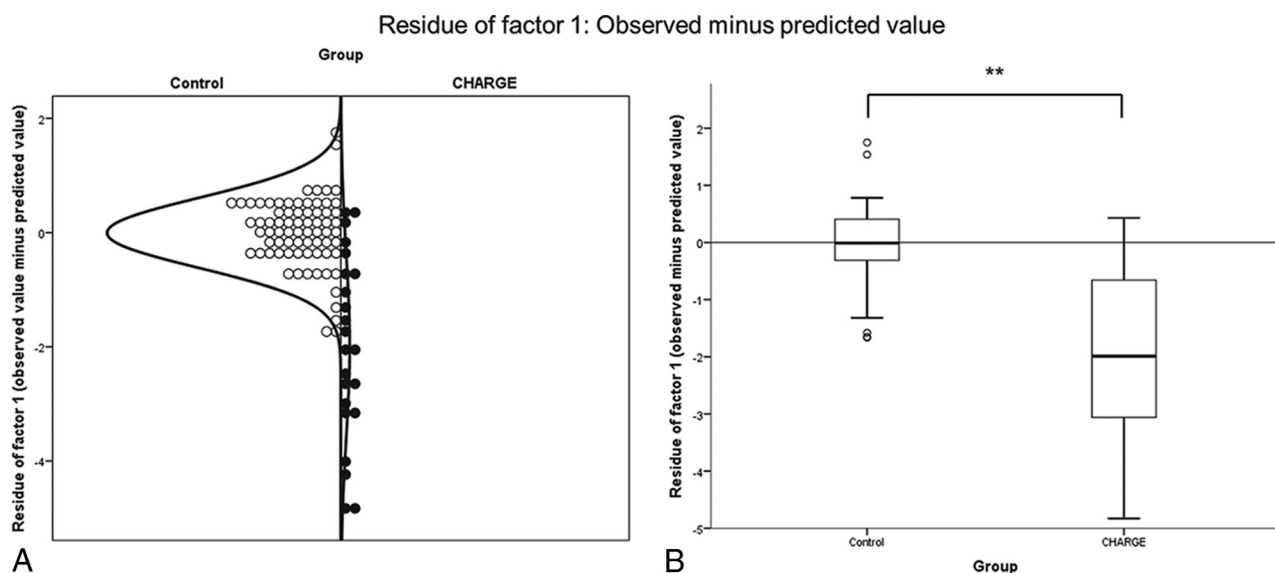

**ON-LINE FIGURE.** Residue of factor 1. Plots of the residue (observed minus predicted value) of the first factor from the principal component analysis. *A*, Scatterplot. *White dots* represent controls; *black dots*, patients. A normal curve has been fitted to both plots. *B*, Boxplot. The residue of factor 1 is significantly lower for patients with CHARGE syndrome. *Double asterisks* indicate  $P < .001$ .
